# Supplementary material
Source: Springer Nature journal article supplement (https://www.springerprofessional.de/resource/supplementary/13638_2013_840_MOESM14_ESM.pdf/11898604)

Partial correlation of the sequence approximation

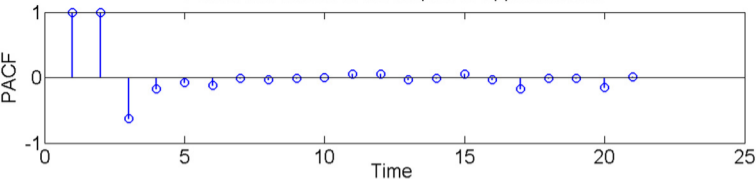

Partial correlation of the first difference

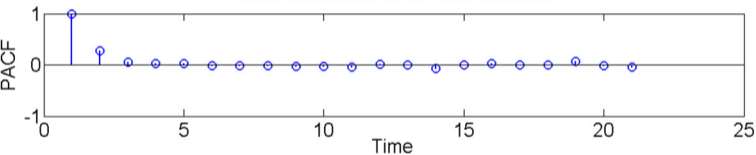

Partial correlation of the second difference

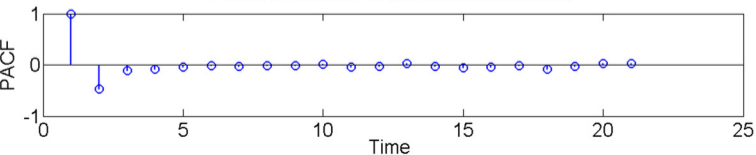

Supplement: MOESM14 [file 11898604]
